# Supplementary material for: Therapeutic effect of and mechanisms underlying the effect of miR-195-5p on subarachnoid hemorrhage-induced vasospasm and brain injury in rats
Source: PeerJ journal article supplement (doi:10.7717/peerj.11395), 2021-06-22
Supplement: Supplementary_file.pdf [file Supplementary_file.pdf]

# Supplement data

1. miR-195-5p and mimic: PhalanxBio Inc.

- miR-195-5p conc. 5nmol/ml/kg

2. Antibody:

iNOS: BD biosciences, 610329

eNOS: BD biosciences, 610279

NF-κB:proteintech, 10745-1-AP

p-NF-κB: cell signaling, 3033

Beta-actin: Sigma, A5441

3. Image assay software: ImageJ, NIH.

4. Analysis software: SPSS

## 5. Target Site Prediction

The miR-195-5p sequence was obtained from miRBase database (<http://www.mirbase.org/>), and miR-195-5p targets were performed by screening the databases: miRDB (<http://mirdb.org/index.html>), microR.org (<http://www.microrna.org/>) and miRwalk (<http://mirwalk.umm.uni-heidelberg.de/>). Then, from the list of mRNAs predicted to be targeted by miR-195-5p, the interaction with IKKα was specifically analyzed.

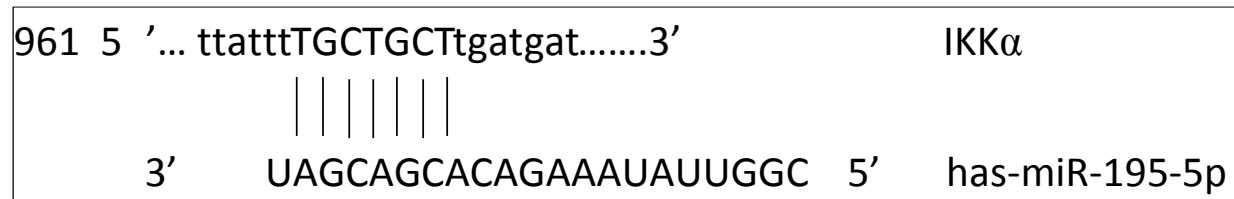

The data were expressed as mean  $\pm$  standard error of the mean and illustrated using GraphPad Prism software (version 8.0; GraphPad, Inc., La Jolla, CA, USA). Differences between the experimental groups were analyzed **by one-way ANOVA was utilized, followed by a Tukey's post hoc test.** (IBM SPSS Statistics, version 24.0; IBM Inc., Armonk, New York, USA). A p-value of < 0.05 was considered significant. All statistical operations were performed using.

|                           | Control | SAH only | SAH+NC-mimic | SAH+miR-195-5p |
|---------------------------|---------|----------|--------------|----------------|
| For Morphometric Analysis | 6       | 6        | 6            | 6              |
| For Western blotting      | 6       | 6        | 6            | 6              |
| For Cell death assay      | 6       | 6        | 6            | 6              |
| For ELISA assay           | 6       | 6        | 6            | 6              |
| Each group                | 24      | 24       | 24           | 24             |
| Total animals             |         |          |              | 96             |

# Raw data

## Fig. 1 Cross-section area of the basilar artery

|                                                           | Control        | SAH        | SAH+NC-mimic        | SAH+miR-195-5p        |
|-----------------------------------------------------------|----------------|------------|---------------------|-----------------------|
| Cross-sectional area of basilar artery (µm <sup>2</sup> ) | 78169.26       | 45632.01   | 39912.12            | 78214.33              |
|                                                           | 72015.7        | 52604.98   | 38674.33            | 71234.23              |
|                                                           | 68101.45       | 41192.36   | 42126.32            | 82136.34              |
|                                                           | 79269.43       | 50741.77   | 41937.24            | 78479.26              |
|                                                           | 74318.79       | 43935.48   | 51312.2             | 79351.59              |
|                                                           | 75030.11       | 44713.69   | *                   | 75153.65              |
| <b>N</b>                                                  | <b>6</b>       | <b>6</b>   | <b>5</b>            | <b>6</b>              |
| <b>One-way anova</b>                                      |                |            |                     |                       |
| <b>F(3,19)=102.623, p &lt; 0.000</b>                      |                |            |                     |                       |
| <b>Tukey test</b>                                         |                |            |                     |                       |
|                                                           | <b>contorl</b> | <b>SAH</b> | <b>SAH+NC-mimic</b> | <b>SAH+miR-195-5p</b> |
| <b>contorl</b>                                            |                | 0.000      | 0.000               | 0.639                 |
|                                                           |                | ***        | ***                 |                       |
| <b>SAH</b>                                                |                |            | 0.503               | 0.000                 |
|                                                           |                |            |                     | ###                   |

# Raw data

## Fig. 2 western blotting for iNOS

|                           | Control        |                 | SAH only            |                       | SAH+NC-mimic |                 | SAH+miR-195-5p |                 |
|---------------------------|----------------|-----------------|---------------------|-----------------------|--------------|-----------------|----------------|-----------------|
|                           | % of control   | iNOS/beta-actin | % of control        | iNOS/beta-actin       | % of control | iNOS/beta-actin | % of control   | iNOS/beta-actin |
|                           | 100.000        | 0.135           | 220.007             | 0.297                 | 235.259      | 0.317           | 126.415        | 0.171           |
|                           | 100.000        | 0.116           | 218.828             | 0.255                 | 191.859      | 0.223           | 93.0           | 0.108           |
|                           | 100.000        | 0.120           | 231.992             | 0.278                 | 176.916      | 0.212           | 139.948        | 0.167           |
|                           | 100.000        | 0.071           | 187.598             | 0.134                 | 205.860      | 0.147           | 131.051        | 0.093           |
|                           | 100.000        | 0.048           | 195.793             | 0.095                 | *            | *               | 148.066        | 0.072           |
|                           | 100.000        | 0.144           | *                   | *                     | *            | *               | *              | *               |
| <b>N</b>                  | <b>6</b>       |                 | <b>5</b>            |                       | <b>4</b>     |                 | <b>5</b>       |                 |
| <b>One-way anova</b>      |                |                 |                     |                       |              |                 |                |                 |
| F(3,16)=49.608, p < 0.000 |                |                 |                     |                       |              |                 |                |                 |
| <b>Tukey test</b>         |                |                 |                     |                       |              |                 |                |                 |
|                           | <b>contorl</b> | <b>SAH</b>      | <b>SAH+NC-mimic</b> | <b>SAH+miR-195-5p</b> |              |                 |                |                 |
| <b>contorl</b>            |                | 0.000           | 0.000               | 0.084                 |              |                 |                |                 |
|                           |                | ***             | ***                 |                       |              |                 |                |                 |
| <b>SAH</b>                |                |                 | 0.893               | 0.000                 |              |                 |                |                 |
|                           |                |                 |                     | ###                   |              |                 |                |                 |

# Raw data

## Fig. 3 western blotting for eNOS

|                           | Control        |                 | SAH only            |                       | SAH+NC-mimic |                 | SAH+miR-195-5p |                 |
|---------------------------|----------------|-----------------|---------------------|-----------------------|--------------|-----------------|----------------|-----------------|
|                           | % of control   | eNOS/beta-actin | % of control        | eNOS/beta-actin       | % of control | eNOS/beta-actin | % of control   | eNOS/beta-actin |
|                           | 100.000        | 0.144           | 83.050              | 0.120                 | 74.955       | 0.108           | 116.517        | 0.168           |
|                           | 100.000        | 0.125           | 87.862              | 0.110                 | 93.721       | 0.117           | 101.254        | 0.126           |
|                           | 100.000        | 0.128           | 93.840              | 0.120                 | 77.441       | 0.099           | 110.166        | 0.141           |
|                           | 100.000        | 0.076           | 89.418              | 0.068                 | 86.113       | 0.066           | 111.698        | 0.085           |
|                           | 100.000        | 0.052           | 74.376              | 0.039                 | *            | *               | 98.728         | 0.051           |
|                           | 100.000        | 0.154           | *                   | *                     | *            | *               | *              | *               |
| <b>N</b>                  | <b>6</b>       |                 | <b>5</b>            |                       | <b>4</b>     |                 | <b>5</b>       |                 |
| <b>One-way anova</b>      |                |                 |                     |                       |              |                 |                |                 |
| F(3,16)=15.748, p < 0.000 |                |                 |                     |                       |              |                 |                |                 |
| <b>Tukey test</b>         |                |                 |                     |                       |              |                 |                |                 |
|                           | <b>contorl</b> | <b>SAH</b>      | <b>SAH+NC-mimic</b> | <b>SAH+miR-195-5p</b> |              |                 |                |                 |
| <b>contorl</b>            |                | 0.010           | 0.004               | 0.240                 |              |                 |                |                 |
|                           |                | *               | **                  |                       |              |                 |                |                 |
| <b>SAH</b>                |                |                 | 0.926               | 0.000                 |              |                 |                |                 |
|                           |                |                 |                     | ###                   |              |                 |                |                 |

# Raw data

## Fig. 4 western blotting for p-NF-κB and NF-κB

|                           | Control        |               | SAH only            |                       | SAH+NC-mimic |               | SAH+miR-195-5p |               |
|---------------------------|----------------|---------------|---------------------|-----------------------|--------------|---------------|----------------|---------------|
|                           | % of control   | p-NF-κB/NF-κB | % of control        | p-NF-κB/NF-κB         | % of control | p-NF-κB/NF-κB | % of control   | p-NF-κB/NF-κB |
|                           | 100.000        | 0.172         | 145.502             | 0.250                 | 147.378      | 0.254         | 83.909         | 0.144         |
|                           | 100.000        | 0.149         | 155.807             | 0.231                 | 150.620      | 0.224         | 76.956         | 0.114         |
|                           | 100.000        | 0.153         | 161.155             | 0.246                 | 180.048      | 0.275         | 84.268         | 0.129         |
|                           | 100.000        | 0.091         | 116.792             | 0.106                 | 119.784      | 0.109         | 103.744        | 0.094         |
|                           | 100.000        | 0.062         | 197.345             | 0.122                 | 199.204      | 0.123         | 90.423         | 0.056         |
|                           | 100.000        | 0.184         | *                   | *                     | *            | *             | *              | *             |
| <b>N</b>                  | <b>6</b>       |               | <b>5</b>            |                       | <b>5</b>     |               | <b>5</b>       |               |
| <b>One-way anova</b>      |                |               |                     |                       |              |               |                |               |
| F(3,17)=15.796, p < 0.000 |                |               |                     |                       |              |               |                |               |
| <b>Tukey test</b>         |                |               |                     |                       |              |               |                |               |
|                           | <b>contorl</b> | <b>SAH</b>    | <b>SAH+NC-mimic</b> | <b>SAH+miR-195-5p</b> |              |               |                |               |
| <b>contorl</b>            |                | 0.002         | 0.001               | 0.779                 |              |               |                |               |
|                           |                | **            | **                  |                       |              |               |                |               |
| <b>SAH</b>                |                |               | 0.990               | 0.001                 |              |               |                |               |
|                           |                |               |                     | ##                    |              |               |                |               |

# Raw data

## Fig. 5 western blotting for p-IκB-α

|          | Control      |                    | SAH only     |                    | SAH+NC-mimic |                    | SAH+miR-195-5p |                    |
|----------|--------------|--------------------|--------------|--------------------|--------------|--------------------|----------------|--------------------|
|          | % of control | p-IκB-α/beta-actin | % of control | p-IκB-α/beta-actin | % of control | p-IκB-α/beta-actin | % of control   | p-IκB-α/beta-actin |
|          | 100.000      | 0.160              | 757.094      | 1.209              | 873.106      | 1.394              | 431.706        | 0.689              |
|          | 100.000      | 0.138              | 613.077      | 0.845              | 594.407      | 0.819              | 369.400        | 0.509              |
|          | 100.000      | 0.142              | 1194.371     | 1.692              | 1254.171     | 1.776              | 517.871        | 0.734              |
|          | 100.000      | 0.084              | 1097.518     | 0.926              | 1097.737     | 0.926              | 407.476        | 0.344              |
|          | *            | *                  | *            | *                  | *            | *                  | *              | *                  |
|          | *            | *                  | *            | *                  | *            | *                  | *              | *                  |
| <b>N</b> | <b>4</b>     |                    | <b>4</b>     |                    | <b>4</b>     |                    | <b>4</b>       |                    |

### One-way anova

$F(3,12)=16.590, p < 0.000$

### Tukey test

|         | contorl | SAH   | SAH+NC-mimic | SAH+miR-195-5p |
|---------|---------|-------|--------------|----------------|
| contorl |         | 0.000 | 0.000        | 0.145          |
|         |         | ***   | ***          |                |
| SAH     |         |       | 0.992        | 0.024          |
|         |         |       | #            |                |

# Supplement data

## Fig. 2 iNOS

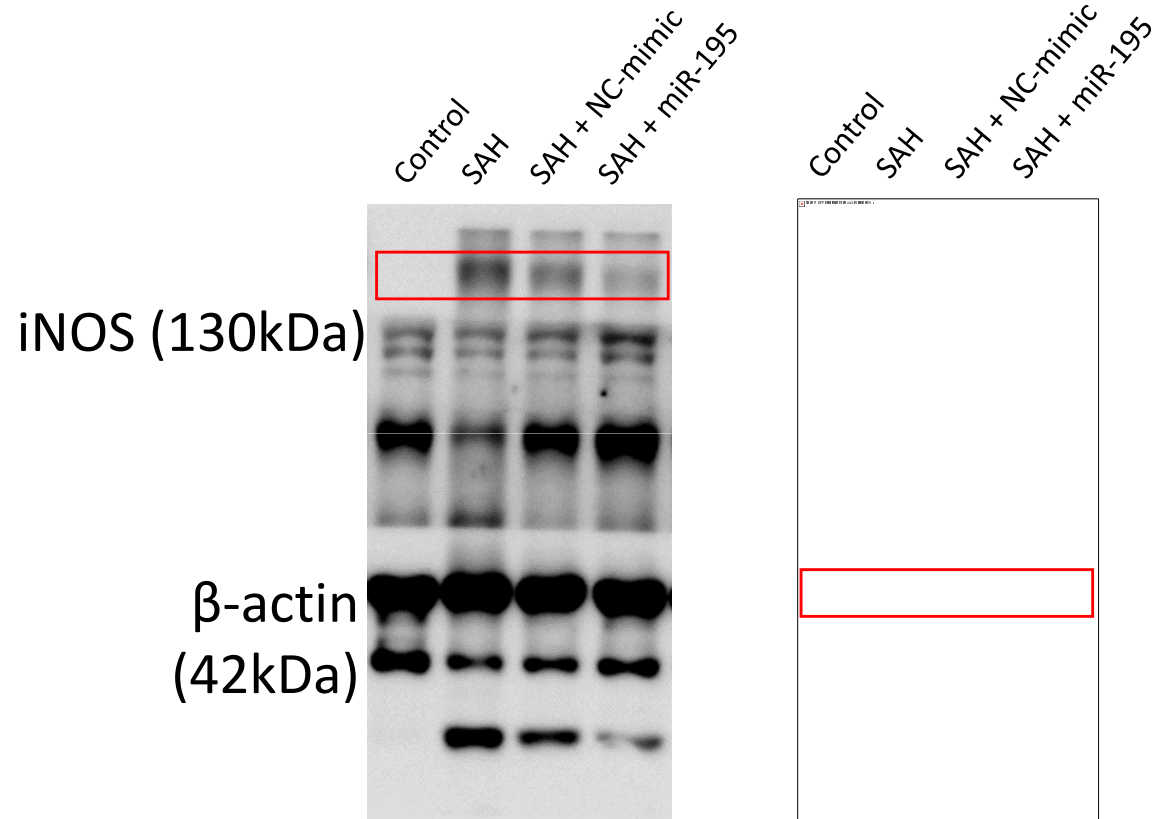

## Fig. 3 eNOS

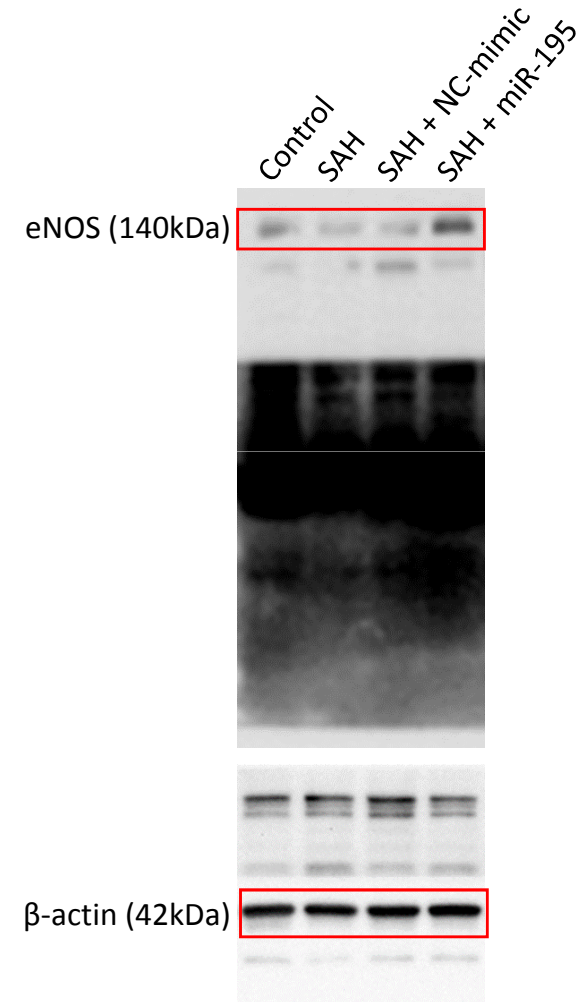



# Supplement data

## Fig. 4 p-NF- $\kappa$ B, NF- $\kappa$ B

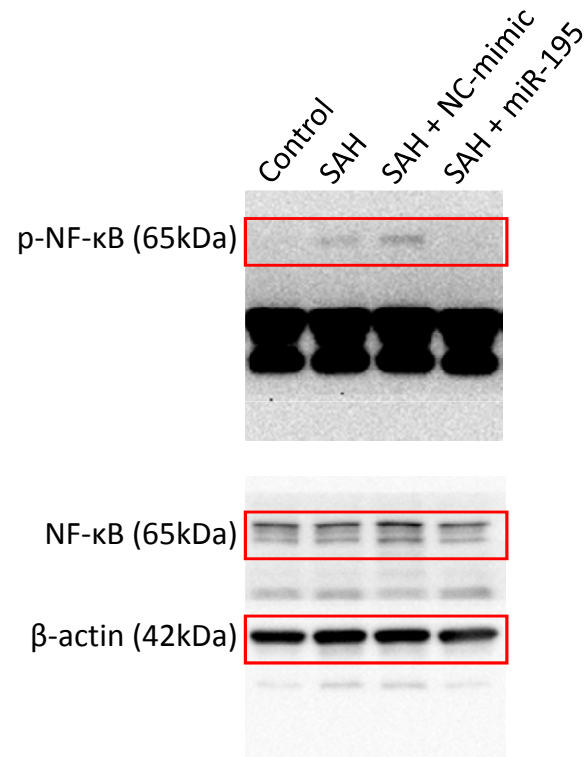

## Fig. 5 p-I $\kappa$ B- $\alpha$

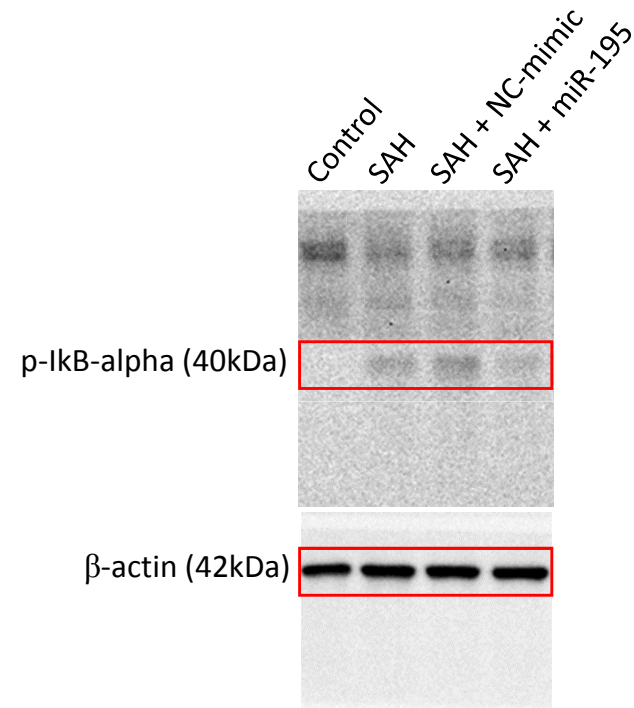

# Raw data: Fig. 6(a) cell death assay for brain tissue

| Cortex   | Control |              | SAH only |              | SAH+NC-mimic |              | SAH+miR-195-5p |              |
|----------|---------|--------------|----------|--------------|--------------|--------------|----------------|--------------|
|          | O.D.    | % of control | O.D.     | % of control | O.D.         | % of control | O.D.           | % of control |
|          | 0.055   | 103.6        | 0.048    | 90.4         | 0.054        | 102.5        | 0.056          | 105.6        |
|          | 0.052   | 98.5         | 0.049    | 92.4         | 0.053        | 99.5         | 0.053          | 100.5        |
|          | 0.058   | 110.7        | 0.047    | 89.3         | 0.047        | 88.3         | 0.055          | 103.6        |
|          | 0.049   | 92.4         | 0.055    | 103.6        | 0.047        | 89.3         | 0.046          | 87.3         |
|          | 0.048   | 91.4         | 0.048    | 91.4         | 0.05         | 95.4         | 0.052          | 97.5         |
|          | 0.055   | 103.6        | 0.048    | 90.4         | 0.055        | 103.6        | 0.05           | 95.4         |
| <b>N</b> | 6       |              | 6        |              | 6            |              | 6              |              |

## One-way anova

$F(3,20)=1.315, p < 0.297$

## Tukey test

|         | contorl | SAH   | SAH+NC-mimi | SAH+miR-195-5p |
|---------|---------|-------|-------------|----------------|
| contorl |         | 0.263 | 0.775       | 0.968          |
| SAH     |         |       | 0.787       | 0.493          |

# Raw data: Fig. 6(a) cell death assay for brain tissue

| Hippcampus | Control |              | SAH only |              | SAH+NC-mimic |              | SAH+miR-195-5p |              |
|------------|---------|--------------|----------|--------------|--------------|--------------|----------------|--------------|
|            | O.D.    | % of control | O.D.     | % of control | O.D.         | % of control | O.D.           | % of control |
|            | 0.061   | 109.6        | 0.059    | 105.5        | 0.054        | 96.2         | 0.06           | 107.5        |
|            | 0.054   | 96.2         | 0.055    | 98.3         | 0.051        | 91.1         | 0.056          | 100.3        |
|            | 0.058   | 104.4        | 0.06     | 106.5        | 0.059        | 105.5        | 0.062          | 111.6        |
|            | 0.057   | 102.4        | 0.057    | 101.4        | 0.054        | 96.2         | 0.054          | 96.2         |
|            | 0.05    | 89.1         | 0.054    | 97.3         | 0.051        | 91.1         | 0.056          | 100.3        |
|            | 0.055   | 98.3         | 0.053    | 95.2         | 0.06         | 107.5        | 0.059          | 105.5        |
| <b>N</b>   | 6       |              | 6        |              | 6            |              | 6              |              |

| One-way anova            |         |       |             |                |
|--------------------------|---------|-------|-------------|----------------|
| F(3,20)=0.850, p < 0.483 |         |       |             |                |
| Tukey test               |         |       |             |                |
|                          | contorl | SAH   | SAH+NC-mimi | SAH+miR-195-5p |
| contorl                  |         | 0.997 | 0.937       | 0.752          |
| SAH                      |         |       | 0.865       | 0.852          |

# Raw data: Fig. 6(a) cell death assay for brain tissue

| Dentate gyrus | Control |              | SAH only |              | SAH+NC-mimic |              | SAH+miR-195-5p |              |
|---------------|---------|--------------|----------|--------------|--------------|--------------|----------------|--------------|
|               | O.D.    | % of control | O.D.     | % of control | O.D.         | % of control | O.D.           | % of control |
|               | 0.06    | 106.8        | 0.115    | 206.5        | 0.125        | 224          | 0.082          | 146.9        |
|               | 0.056   | 99.7         | 0.108    | 194.2        | 0.113        | 202.4        | 0.069          | 124.3        |
|               | 0.053   | 95.5         | 0.12     | 216          | 0.105        | 189          | 0.1            | 178.8        |
|               | 0.053   | 94.5         | 0.102    | 183.9        | 0.086        | 154          | 0.08           | 142.8        |
|               | 0.06    | 106.8        | 0.083    | 149          | 0.118        | 211.6        | 0.074          | 132.5        |
|               | 0.054   | 96.6         | *        | *            | *            | *            | *              | *            |
| N             | 6       |              | 5        |              | 5            |              | 5              |              |

## One-way anova

$F(3,17)=25.264, p < 0.000$

## Tukey test

|         | contorl | SAH   | SAH+NC-mimi | SAH+miR-195-5p |
|---------|---------|-------|-------------|----------------|
| contorl |         | 0.000 | 0.000       | 0.012          |
|         |         | ***   | ***         | *              |
| SAH     |         |       | 0.964       | 0.017          |
|         |         |       | #           |                |

Raw data: Fig. 6(b) ELISA data of TNF- $\alpha$

| <b>Cortex</b>                      | control        | SAH only   | SAH+NC-mimic        | SAH+miR-195-5p        |
|------------------------------------|----------------|------------|---------------------|-----------------------|
| TNF- $\alpha$ Conc.<br>(pg/ml)     | 86.25          | 64.97      | *                   | 69.36                 |
|                                    | 75.79          | *          | 84.23               | 87.11                 |
|                                    | 64.69          | 82.67      | 82.78               | 69.42                 |
|                                    | 54.74          | 91.89      | 71.24               | *                     |
|                                    | 72.63          | 94.18      | 89.98               | 73.99                 |
|                                    | 52.43          | 87.69      | 82.36               | 87.15                 |
| <b>N</b>                           | <b>6</b>       | <b>5</b>   | <b>5</b>            | <b>5</b>              |
| <b>One-way anova</b>               |                |            |                     |                       |
| <b>F(3,17)=2.700, p &lt; 0.078</b> |                |            |                     |                       |
| <b>Tukey test</b>                  |                |            |                     |                       |
|                                    | <b>control</b> | <b>SAH</b> | <b>SAH+NC-mimic</b> | <b>SAH+miR-195-5p</b> |
| <b>control</b>                     |                | 0.083      | 0.152               | 0.455                 |
| <b>SAH</b>                         |                |            | 0.988               | 0.736                 |

Raw data: Fig. 6(b) ELISA data of TNF- $\alpha$

| Hippocampus                    | control | SAH only | SAH+NC-mimic | SAH+miR-195-5p |
|--------------------------------|---------|----------|--------------|----------------|
| TNF- $\alpha$ Conc.<br>(pg/ml) | 93.36   | 98.28    | 116.68       | *              |
|                                | 87.44   | 84.31    | 97.28        | 76.27          |
|                                | 76.21   | 76.16    | *            | 67.06          |
|                                | 69.11   | 97.4     | 109.42       | 84.61          |
|                                | 72.36   | 83.13    | 94.87        | 86.24          |
|                                | 54.46   | 103.62   | 67.94        | 98.41          |
| N                              | 6       | 6        | 5            | 5              |
| <b>One-way anova</b>           |         |          |              |                |
| F(3,18)=2.548, p < 0.088       |         |          |              |                |
| <b>Tukey test</b>              |         |          |              |                |
|                                | control | SAH      | SAH+NC-mimic | SAH+miR-195-5p |
| control                        |         | 0.275    | 0.080        | 0.837          |
| SAH                            |         |          | 0.852        | 0.780          |

Raw data: Fig. 6(b) ELISA data of TNF- $\alpha$

| <b>Dentate Gyrus</b>                | control        | SAH only   | SAH+NC-mimic        | SAH+miR-195-5p        |
|-------------------------------------|----------------|------------|---------------------|-----------------------|
| TNF- $\alpha$ Conc.<br>(pg/ml)      | 75.36          | 107.48     | 103.36              | 76.44                 |
|                                     | 61.36          | 123.36     | 106.35              | *                     |
|                                     | 64.14          | 114.21     | 99.51               | 74.94                 |
|                                     | 74.36          | 108.49     | 87.03               | 69.17                 |
|                                     | 73.32          | *          | 126.37              | 59.1                  |
|                                     | *              | 87.36      | *                   | 89.65                 |
| <b>N</b>                            | <b>5</b>       | <b>5</b>   | <b>5</b>            | <b>5</b>              |
| <b>One-way anova</b>                |                |            |                     |                       |
| <b>F(3,16)=14.816, p &lt; 0.000</b> |                |            |                     |                       |
| <b>Tukey test</b>                   |                |            |                     |                       |
|                                     | <b>control</b> | <b>SAH</b> | <b>SAH+NC-mimic</b> | <b>SAH+miR-195-5p</b> |
| <b>control</b>                      |                | 0.000      | 0.001               | 0.942                 |
|                                     |                | ***        | **                  |                       |
| <b>SAH</b>                          |                |            | 0.959               | 0.001                 |
|                                     |                |            |                     | ##                    |
